# Supplementary material
Source: Springer Nature journal article supplement (https://www.springerprofessional.de/resource/supplementary/13638_2011_126_MOESM2_ESM.pdf/11897094)

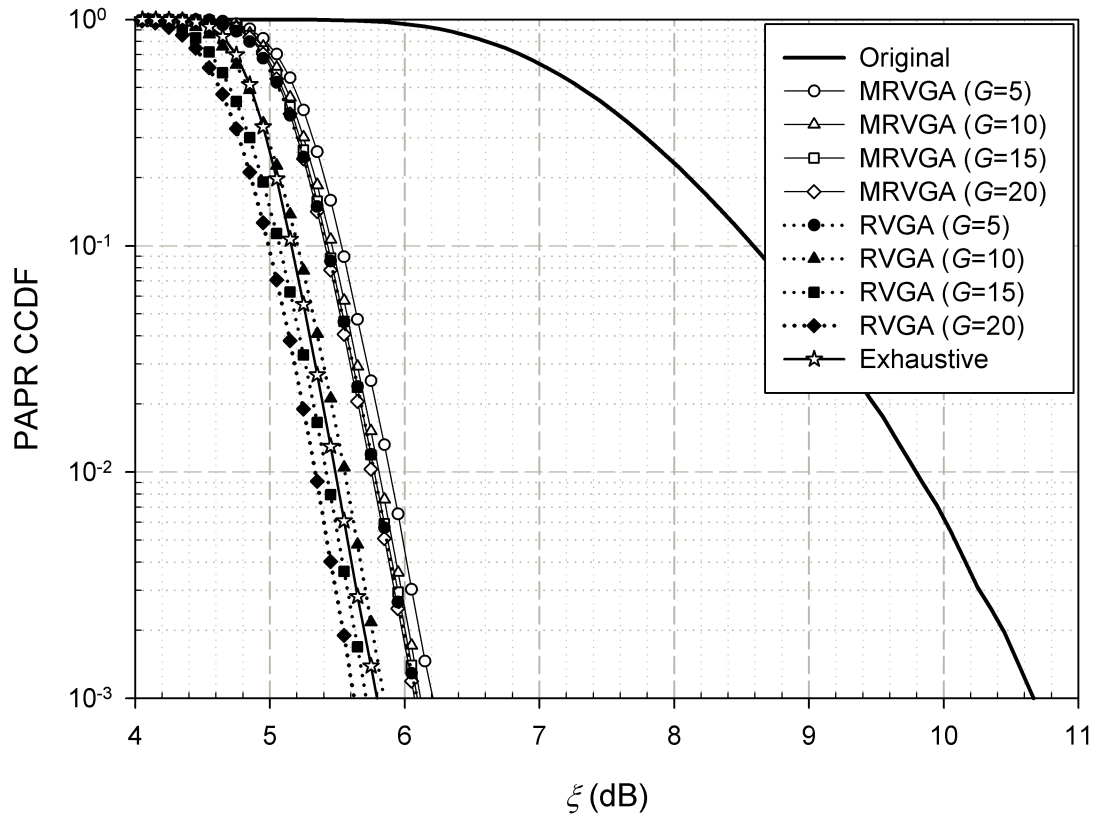

Supplement: MOESM2 [file 11897094]
